# Supplementary material
Source: Springer Nature journal article supplement (https://www.springermedizin.de/resource/supplementary/12979_2005_21_MOESM6_ESM.pdf/9603184)

**A.**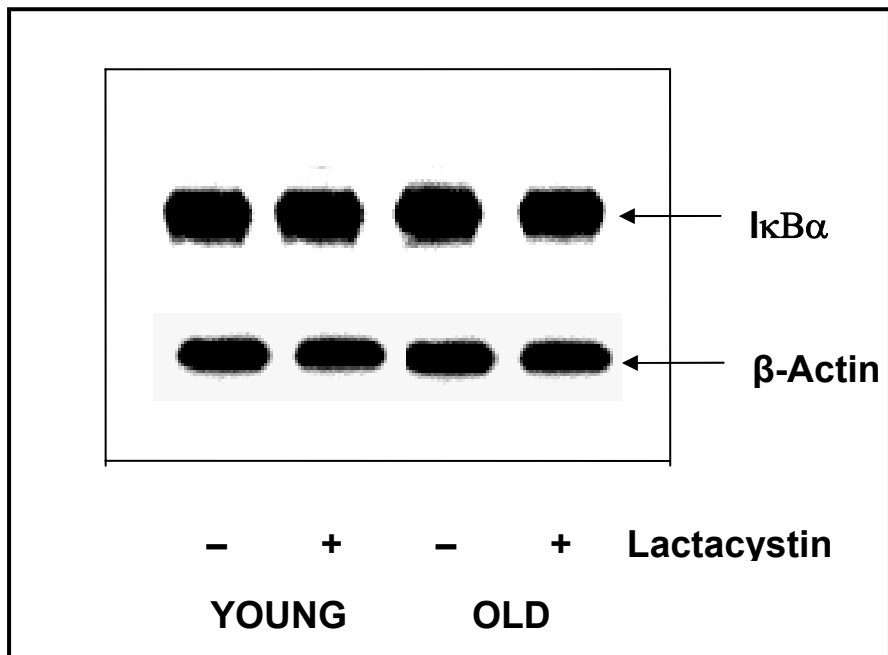**B.**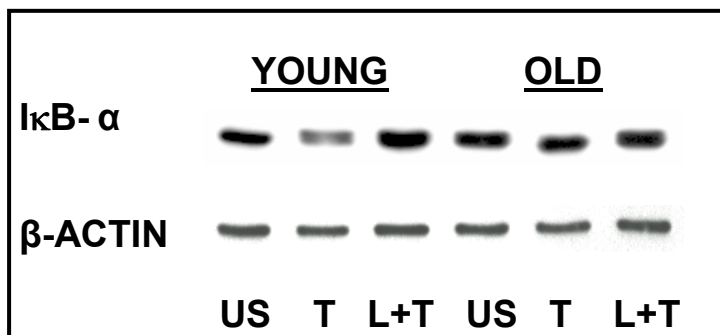

Supplement: MOESM6 [file 9603184]
